# Supplementary material
Source: publisher figshare collection journal article supplement (https://frontiersin.figshare.com/ndownloader/files/15014807)
Supplement: Supplementary file [file 15014807]

# ***Supplementary Material:*** **Towards a Multi-level Exploration of Human and Computational Re-representation in Unified Cognitive Frameworks**

## **1 SUPPLEMENTARY TABLES AND FIGURES**

**Table S1.** Stimuli used in the ambiguous figures task

|                                                                                                             |                                                                                                             |                                                                                                              |
|-------------------------------------------------------------------------------------------------------------|-------------------------------------------------------------------------------------------------------------|--------------------------------------------------------------------------------------------------------------|
| <p><b>Picture 1</b></p>   | <p><b>Picture 2</b></p>  | <p><b>Picture 3</b></p>  |
| <p><b>Picture 4</b></p>  | <p><b>Picture 5</b></p>  |                                                                                                              |

Table S2. Stimuli used in the pattern meanings test

|                                                                                                       |                                                                                                       |                                                                                                         |
|-------------------------------------------------------------------------------------------------------|-------------------------------------------------------------------------------------------------------|---------------------------------------------------------------------------------------------------------|
| <b>Pattern 1</b><br>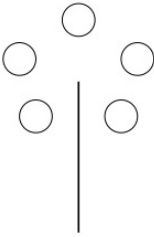 | <b>Pattern 2</b><br> | <b>Pattern 3</b><br> |
| <b>Pattern 4</b><br> | <b>Pattern 5</b><br> | <b>Pattern 6</b><br> |

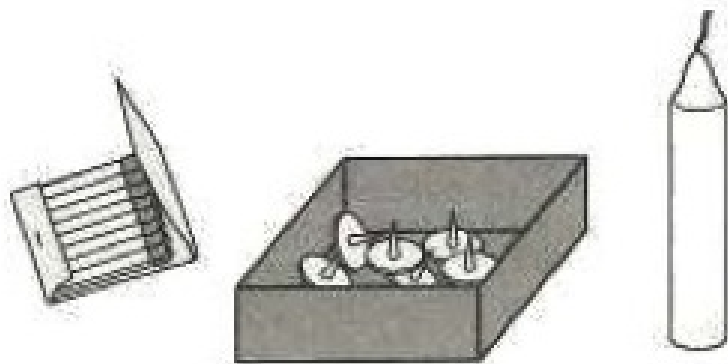

Figure S1. The candle problem

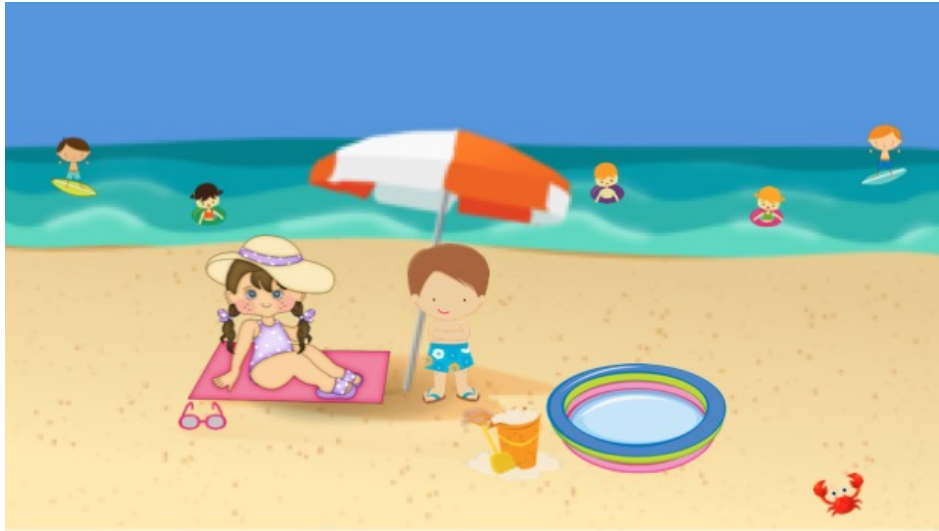

**Figure S2.** The Jack and Jill weight problem
